# Supplementary material for: Personalized pharmacokinetic targeting with busulfan in allogeneic hematopoietic stem cell transplantation in infants with acute lymphoblastic leukemia
Source: Springer Nature journal article supplement (doi:10.1007/s12185-019-02684-0), 2019-06-14

**Table S1. Performance Status (PS) Grade according to the JPLSG Infant Leukemia Committee**

| 0 | Fully active, good limb movement without restriction  Normal suckling and dietary intake  Crying strong; laughing in a good mood after solving a problem |
| --- | --- |
| 1 | Hypoactive, although with no restriction in limb movement  Dietary intake reduced to 70 % or less than usual  Crying less strong; often laughing glumly |
| 2 | Quiet, reduced limb movements  Dietary intake reduced to 50 % or less than usual  Crying weak; reduced laughing |
| 3 | Not doing well, seldom moves limbs  Decreased appetite; dietary intake reduced to 25 % or less than usual  Crying rather weak; almost no laughing |
| 4 | Total absence of movement  Unable to eat or drink  Completely inactive; unable to cry; general apathy |

**Table S2. Clinical data on 31 patients analyzed in this study**

| No. | Sex | Age Dx | MLL status | WBC  Dx | CNS  status | PSL response | Age SCT | SCT source | HLA match | BU route | Dose | Css | AUC0-∞ | Engraftment | Engraftment | GVHD | Relapse, Sites | Survival | Mortality, |
| --- | --- | --- | --- | --- | --- | --- | --- | --- | --- | --- | --- | --- | --- | --- | --- | --- | --- | --- | --- |
| ANC | platelet | Adverse events |
|  |  | months |  | 109/L |  |  | M |  |  |  | mg/kg | ng/mL | μg*h/mL | days | days | grade |  |  |  |
| 1 | F | 1 | t(4;11) | 660 | - | Poor | 4 | CB | 4/6 | PO | 0.75 | 445 | 49.0 | 15 | 22 | 1(skin2) | BM | Alive | Secondary MDS |
| 2 | M | 4 | t(4;11) | 49.8 | - | Good | 8 | CB | 5/6 | PO | 0.81 | 540 | 63.2 | 30 | - | 0 | - | Dead | TRALI |
| 3 | F | 11 | t(4;11) | 158.4 | - | Good | 15 | rBM | 6/6 | PO | 1.45 | 722 | NA | 11 | 11 | 0 | - | Alive |  |
| 4 | M | 7 | other | 83.6 | - | Good | 10 | CB | 4/6 | PO | 1.0 | 595 | 65.1 | 16 | 44 | 1(skin2) | - | Alive |  |
| 5 | F | 0 | t(4;11) | 112.6 | - | Good | 3 | CB | 3/6 | PO | 1.1 | 793 | 77.8 | 16 | 46 | 1(skin1) | BM | Alive |  |
| 6 | M | 6 | other | 8 | - | Good | 10 | NA | 5/6 | PO | 0.7 | 664 | 62.4 | 23 | 41 | 0 | - | Alive |  |
| 7 | F | 6 | other | 43.3 | - | Good | 9 | CB | 4/6 | PO | 1.5 | 949 | 83.5 | 21 | 46 | 2(skin2gut1) | - | Alive |  |
| 8 | F | 5 | other | 7.85 | - | Good | 9 | rBM | NA | PO | 1.25 | 753 | 85.7 | 29 | 20 | 2(skin1gut2) | - | Alive |  |
| 9 | F | 2 | t(4;11) | 26.8 | - | Good | 5 | CB | 2/6 | PO | 0.9 | 856 | 78.7 | 16 | 30 | 1(skin1) | BM | Dead | leukemia |
| 10 | M | 2 | t(4;11) | 9 | - | Good | 6 | rBM | NA | PO | 1.18 | 815 | 78.2 | 25 | 34 | 2(skin3) | BM, CNS, soft tissue | Dead | pneumonia, on disease |
| 11 | F | 2 | other | 90.9 | - | Poor | 7 | CB | 5/6 | PO | 1.45 | 776 | 70.2 | 19 | 26 | 2(skin3) | BM, CNS, soft tissue | Dead | leukemia |
| 12 | F | 5 | t(4;11) | 40.2 | - | Good | 9 | CB | NA | PO | 1.28 | 762 | 73.1 | 19 | 35 | 1(skin1) | - | Alive |  |
| 13 | M | 2 | other | 119.8 | - | Poor | 9 | CB | 5/6 | PO | 1.3 | 597 | NA | 15 | 27 | 1(skin2) | BM | Alive |  |
| 14 | F | 5 | t(9;11) | 11.8 | - | Good | 10 | rBM | 6/6 | PO | 1.13 | 562 | 63.6 | 31 | 27 | 0 | BM, CNS, soft tissue, orbit | Alive |  |
| 15 | M | 3 | t(4;11) | 11.7 | - | Good | 9 | CB | 6/6 | PO | 2.08 | 405 | 50.3 | 23 | 16 | 1(skin3) | BM | Dead | leukemia |
| 16 | F | 4 | other | 632 | - | Good | 8 | rBM | NA | PO | 1.38 | 698 | 67.0 | 28 | 22 | 1(skin1) | - | Alive |  |
| 17 | M | 11 | t(4;11) | 54.7 | - | Good | 14 | CB | 5/6 | PO | 0.99 | 659 | 63.2 | 16 | 41 | 3(skin3gut4) | - | Alive |  |
| 18 | M | 5 | t(4;11) | 1.8 | - | Good | 9 | rBM | 6/6 | PO | 1.5 | 1807 | NA | 16 | 16 | 0 | - | Alive |  |
| 19 | F | 0 | t(11;19) | 50.7 | CNS | Poor | 4 | rBM | 4/6 | IV | 0.8 | 671 | 64.4 | 22 | 52 | 1(skin1) | skin | Alive |  |
| 20 | M | 2 | t(4;11) | 304.5 | - | Good | 6 | CB | 6/6 | IV | 0.53 | 715 | 86.8 | 14 | 53 | 1(skin1) | - | Alive |  |
| 21 | F | 10 | other | 3.8 | - | Good | 14 | CB | 5/6 | IV | 0.96 | 771 | 74.0 | 14 | 42 | 0 | BM, skin | Alive |  |
| 22 | M | 4 | other | 15.1 | CNS | Good | 9 | CB | 4/6 | IV | 0.58 | 484 | 67.9 | 24 | 53 | 1(skin1) | - | Alive |  |
| 23 | F | 2 | t(4;11) | 43.5 | - | Good | 7 | CB | 5/6 | IV | 0.53 | 549 | 62.6 | 16 | 16 | 1(skin2) | BM | Dead | leukemia |
| 24 | F | 9 | other | 8.53 | - | Good | 13 | rBM | 6/6 | IV | 1.01 | 1247 | 119.7 | 16 | 41 | 0 | BM | Dead | hypoxia |
| 25 | F | 1 | t(11;19) | 647 | - | Good | 5 | CB | 6/6 | IV | 0.56 | 1058 | 109.7 | 16 | 22 | 1(skin2) | BM | Alive |  |
| 26 | M | 9 | other | 105.77 | - | Poor | 12 | rBM | 6/6 | IV | 0.69 | 1125 | NA | 16 | 40 | 0 | BM | Alive |  |
| 27 | M | 2 | other | 54.4 | - | Good | 8 | CB | NA | IV | 0.6 | 1164 | 111.7 | 23 | 43 | 2(skin2gut1) | - | Alive |  |
| 28 | F | 7 | t(4;11) | 117.8 | CNS | Poor | 11 | CB | 5/6 | IV | 0.59 | 616 | 68.7 | 19 | 33 | 0 | - | Alive |  |
| 29 | F | 8 | other | 6.6 | - | Good | 12 | CB | NA | IV | 0.9 | 795 | 76.3 | 14 | 38 | 3(gut3) | BM | Alive |  |
| 30 | F | 0 | other | 440 | - | Poor | 4 | rBM | 6/6 | IV | 0.63 | 763 | NA | 13 | 26 | 1(skin1) | - | Alive |  |
| 31 | F | 7 | t(4;11) | 310.82 | - | Good | 12 | CB | 6/6 | IV | 1.0 | 1104 | NA | 23 | 65 | 0 | - | Alive |  |

Abbreviations: ANC=absolute neutrophil count; AUC=area under the curve; BM=bone marrow; BU=busulfan; CB=cord blood; CNS=central nervous system; Css=steady state concentration; Dx=at diagnosis; F=female; GVHD=graft-versus-host disease; HLA match=high-resolution human leukocyte antigen match; IV=intravenous; M=male; MDS=myelodysplastic syndromes; NA=not available; PO=per os; PSL=prednisolone; rBM=related bone marrow; SCT=stem cell transplantation; TRALI=transfusion-related acute lung injury; WBC=white blood cell.

**Table S3. Therapy-related toxicity including sinusoidal obstruction syndrome with or without PK based BU dose adjustment**

| No. | Age at SCT (day) | SCT source | BW (kg) | BSA (m2) | Ad Route | PK | Total BU amount (mg/kg) | Average BU dose (mg/kg) | Css at first-dose PK  (ng/mL) | tAUC  (µg*h/mL) | PS score | Ｔ bil (grade) | AST/ALT (grade) | Hypoxia (grade) | TMA (grade) | SOS (grade) |
| --- | --- | --- | --- | --- | --- | --- | --- | --- | --- | --- | --- | --- | --- | --- | --- | --- |
| 1 | 144 | CB | 6.1 | 0.32 | PO | + | 13.5 | 0.8 | 445 | 49.0 | 0 | 2 | 2 |  |  |  |
| 2 | 279 | CB | 6.8 | 0.36 | PO | + | 15.6 | 1.0 | 540 | 63.2 | 0 |  | 2 |  |  | 2 |
| 3 | 476 | BM | 9.1 | 0.44 | PO | + | 23.2 | 1.5 | 722 | NA | 2 |  | 1 |  |  |  |
| 4 | 336 | CB | 8.1 | 0.4 | PO | + | 18.0 | 1.1 | 595 | 65.1 | 1 |  | 1 |  |  |  |
| 5 | 113 | CB | 4 | 0.24 | PO | + | 16.0 | 1.0 | 793 | 77.8 | 0 |  | 1 | 3 | 2 | 2 |
| 6 | 314 | CB | 8.5 | 0.41 | PO | + | 12.4 | 0.8 | 664 | 62.4 | 1 | 3 | 1 |  |  |  |
| 7 | 309 | CB | 8.5 | 0.4 | PO | + | 20.9 | 1.3 | 949 | 83.5 | 0 |  | 1 |  |  |  |
| 8 | 297 | BM | 8 | 0.4 | PO | + | 21.1 | 1.3 | 753 | 85.7 | 0 |  | 2 |  |  |  |
| 9 | 189 | CB | 6.6 | 0.33 | PO | + | 13.9 | 0.9 | 856 | 78.7 | 0 |  |  |  |  |  |
| 10 | 210 | BM | 6.8 | 0.34 | PO | + | 18.8 | 1.2 | 815 | 78.2 | 0 | 2 |  |  | 1 |  |
| 11 | 221 | CB | 7.6 | 0.38 | PO | + | 21.8 | 1.4 | 776 | 70.2 | 1 |  | 1 |  |  |  |
| 12 | 285 | CB | 7.8 | 0.37 | PO | + | 20.5 | 1.3 | 762 | 73.1 | 0 |  |  |  |  |  |
| 13 | 228 | CB | 5.5 | 0.31 | PO | + | 23.3 | 1.5 | 597 | NA | 1 |  | 2 |  |  |  |
| 14 | 340 | CB | 8 | 0.39 | PO | + | 11.2 | 0.7 | 562 | 63.6 | 0 | 3 | 1 |  |  | 3 |
| 15 | 229 | CB | 6.9 | 0.36 | PO | + | 35.9 | 2.2 | 405 | 50.3 | 0 |  |  |  |  |  |
| 16 | 252 | BM | 6.5 | 0.34 | PO | + | 22.2 | 1.4 | 698 | 67.0 | 0 |  | 2 |  |  |  |
| 17 | 449 | CB | 9.3 | 0.43 | PO | + | 15.5 | 1.0 | 659 | 63.2 | 0 |  | 1 |  |  |  |
| 18 | 295 | BM | 8.4 | 0.4 | PO | + | 18.9 | 1.2 | 1807 | NA | 0 | 2 | 1 |  |  |  |
| 19 | 142 | BM | 4.3 | 0.26 | IV | + | 13.4 | 0.8 | 671 | 64.4 | 2 |  |  | 3 |  |  |
| 20 | 190 | CB | 6.6 | 0.35 | IV | + | 9.4 | 0.6 | 715 | 86.8 | 2 | 3 | 1 | 2 |  | 3 |
| 21 | 458 | CB | 8.4 | 0.4 | IV | + | 15.2 | 1.0 | 771 | 74.0 | 0 | 2 | 2 |  |  |  |
| 22 | 287 | CB | 8.6 | 0.43 | IV | + | 12.8 | 0.8 | 484 | 67.9 | 0 | 2 | 1 | 3 |  |  |
| 23 | 240 | CB | 7.4 | 0.36 | IV | + | 9.6 | 0.6 | 549 | 62.6 | 2 | 3 | 3 | 3 |  | 2 |
| 24 | 414 | BM | 7.2 | 0.37 | IV | + | 7.3 | 0.5 | 1247 | 119.7 | 1 |  |  |  |  |  |
| 25 | 178 | CB | 5.5 | 0.3 | IV | + | 7.6 | 0.5 | 1058 | 109.7 | 1 |  | 3 |  |  |  |
| 26 | 401 | BM | 9 | 0.43 | IV | + | 10.7 | 0.7 | 1125 | NA | 0 |  | 2 |  |  |  |
| 27 | 200 | CB | 6.3 | 0.34 | IV | + | 8.6 | 0.5 | 1164 | 111.7 | 0 |  | 3 |  |  |  |
| 28 | 352 | CB | 10.2 | 0.45 | IV | + | 12.1 | 0.8 | 616 | 68.7 | 0 |  |  |  |  |  |
| 29 | 391 | CB | 6.7 | 0.36 | IV | + | 14.3 | 0.9 | 795 | 76.3 | 0 |  | 2 |  |  |  |
| 30 | 144 | BM | 4.8 | 0.29 | IV | + | 10.0 | 0.6 | 763 | NA | 0 |  | 1 |  |  |  |
| 31 | 375 | CB | 8.6 | 0.41 | IV | + | 13.4 | 0.8 | 1104 | NA | 0 |  | 1 |  |  |  |
| 32 | 314 | CB | 8.1 | 0.4 | PO | - | 27.7 | 1.7 | - | - | 0 |  |  |  |  |  |
| 33 | 390 | CB | 9.2 | 0.43 | PO | - | 22.6 | 1.4 | - | - | 1 |  |  |  |  |  |
| 34 | 425 | CB | 9.6 | 0.45 | PO | - | 27.0 | 1.7 | - | - | 0 | 4 | 4 | 4 |  | 4 |
| 35 | 237 | CB | 7.9 | 0.39 | PO | - | 27.3 | 1.7 | - | - | 2 |  |  |  |  |  |
| 36 | 264 | BM | 8.4 | 0.4 | PO | - | 26.7 | 1.7 | - | - | 0 |  |  |  |  |  |
| 37 | 234 | CB | 10.1 | 0.44 | PO | - | 16.7 | 1.0 | - | - | 0 | 3 | 1 |  |  | 3 |
| 38 | 209 | BM | 8.5 | 0.41 | PO | - | 15.4 | 1.0 | - | - | 0 |  | 1 | 2 |  |  |
| 39 | 232 | CB | 8 | 0.39 | IV | - | 15.1 | 0.9 | - | - | 0 | 3 |  |  | 1 | 3 |
| 40 | 272 | CB | 6.5 | 0.34 | IV | - | 13.8 | 0.9 | - | - | 0 | 3 | 1 |  |  | 2 |
| 41 | 279 | CB | 8.3 | 0.39 | IV | - | 11.4 | 0.7 | - | - | 2 |  |  |  |  |  |
| 42 | 400 | CB | 9 | 0.42 | IV | - | 16.0 | 1.0 | - | - | 0 | 2 | 2 |  |  | 3 |

Abbreviations: Ad=administration; ALT=alanine transaminase; AST=aspartate transaminase; BM=bone marrow; BSA=body surface area; BU=busulfan; BW=body weight; CB=cord blood; Css=steady state concentration; IV=intravenous; NA=not available; PK=pharmacokinetic analysis; PO=per os; PS=performance status; SCT=stem cell transplantation; tAUC=total area under the curve; TMA=thrombotic microangiopathy; SOS=sinusoidal obstruction syndrome.

**Figure S1. Number of patients analyzed in this study; 35 infants at PK test; 34 infants at first-dose PK; 31 infants with both PK data at test and first-dose PK data**


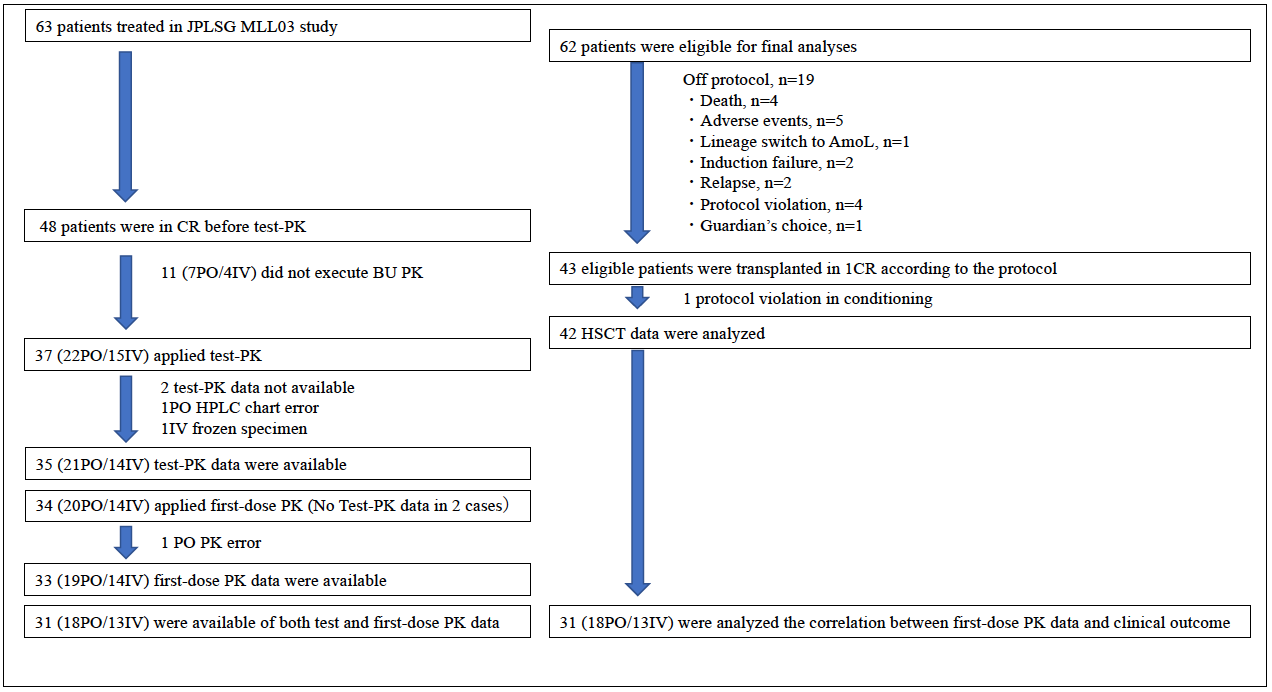

Supplement: MOESM1 [file 16813646]
